# Supplementary material
Source: PubMed Central journal article supplement (PMC2898414)

## SUPPLEMENTAL FIGURE LEGENDS

**SUPPLEMENTAL FIGURE 1. Validation of the specificity of the antibodies used to identify PGC-1 $\alpha$ .** *A*, Total lysates from SH-SY5Y cells were subjected to SDS-PAGE followed by Western blot analysis with polyclonal rabbit PGC-1 $\alpha$  antibody (Santa Cruz Biotechnology) or monoclonal mouse PGC-1 $\alpha$  antibody (Calbiochem). Arrows evidence the molecular weights of PGC-1 $\alpha$  reported in the manufacturer's datasheets. *B*, Mouse PGC-1 $\alpha$  was overexpressed in SH-SY5Y cells (PGC-1 $\alpha$ ) using a pSV-PGC1 vector. After 48 h from transfection, PGC-1 $\alpha$  and Actin content was determined by Western blot analysis on total protein extracts with polyclonal rabbit PGC-1 $\alpha$  antibody (Santa Cruz Biotechnology) or monoclonal mouse PGC-1 $\alpha$  antibody (Calbiochem). *C*, SH-SY5Y cells were transiently transfected with siRNA against PGC-1 $\alpha$  (siPGC-1 $\alpha$ ) or with a scramble siRNA (siscr). After 12h from transfection, PGC-1 $\alpha$  and GAPDH content was determined by Western blot analysis on total protein extracts with polyclonal rabbit PGC-1 $\alpha$  antibody (Santa Cruz Biotechnology) or monoclonal mouse PGC-1 $\alpha$  antibody (Calbiochem). Arrows evidence the molecular weights of PGC-1 $\alpha$  reported in the manufacturer's datasheets. PGC-1 $\alpha$  and GAPDH mRNA content was determined after 12 by RT-PCR. Density of bands was calculated using the software Quantity one (Bio-Rad) and numerical data represent the ratio of PGC-1 $\alpha$ /GAPDH. All the changes reported are statistically significant (\* $p < 0,001$ ). *D*, Total mitochondria lysates from mouse liver were subjected to SDS-PAGE followed by Western blot analysis with polyclonal rabbit PGC-1 $\alpha$  antibody (Santa Cruz Biotechnology) or monoclonal mouse PGC-1 $\alpha$  antibody (Calbiochem). Asterisks evidence the molecular weights of PGC-1 $\alpha$  reported in the manufacturer's datasheets. *E*, Total mitochondria lysates from HeLa cells were subjected to SDS-PAGE followed by Western blot analysis with polyclonal rabbit PGC-1 $\alpha$  antibody (Santa Cruz Biotechnology) or monoclonal mouse PGC-1 $\alpha$  antibody (Calbiochem). Arrows evidence the molecular weights of PGC-1 $\alpha$  reported in the manufacturer's datasheets.

**SUPPLEMENTAL FIGURE 2. Assay of the presence of SIRT1 and PGC-1 $\alpha$  in cross-linked mitochondrial nucleoids from mouse liver.** Nucleoids were purified as described under Experimental Procedures. Upper panel: The presence of mtDNA in the fraction containing purified nucleoids (N) was assayed by performing PCR analysis of D-loop region. Bottom panel: After cross-linking reversion, the fraction was subjected to SDS-PAGE. Total mitochondrial lysates from mouse liver (Mito) were loaded in parallel as control. Western blot analysis with mouse anti-cytochrome *c* oxidase subunit IV (COX IV) and mouse anti-cytochrome *c* (Cyt *c*) were carried out to determine the possible presence of protein contaminants. PGC-1 $\alpha$ , SIRT1, HSP60, TFAM and SOD2 were detected by using specific rabbit antibodies (Santa Cruz Biotechnology).

SUPPLEMENTAL FIGURE 1

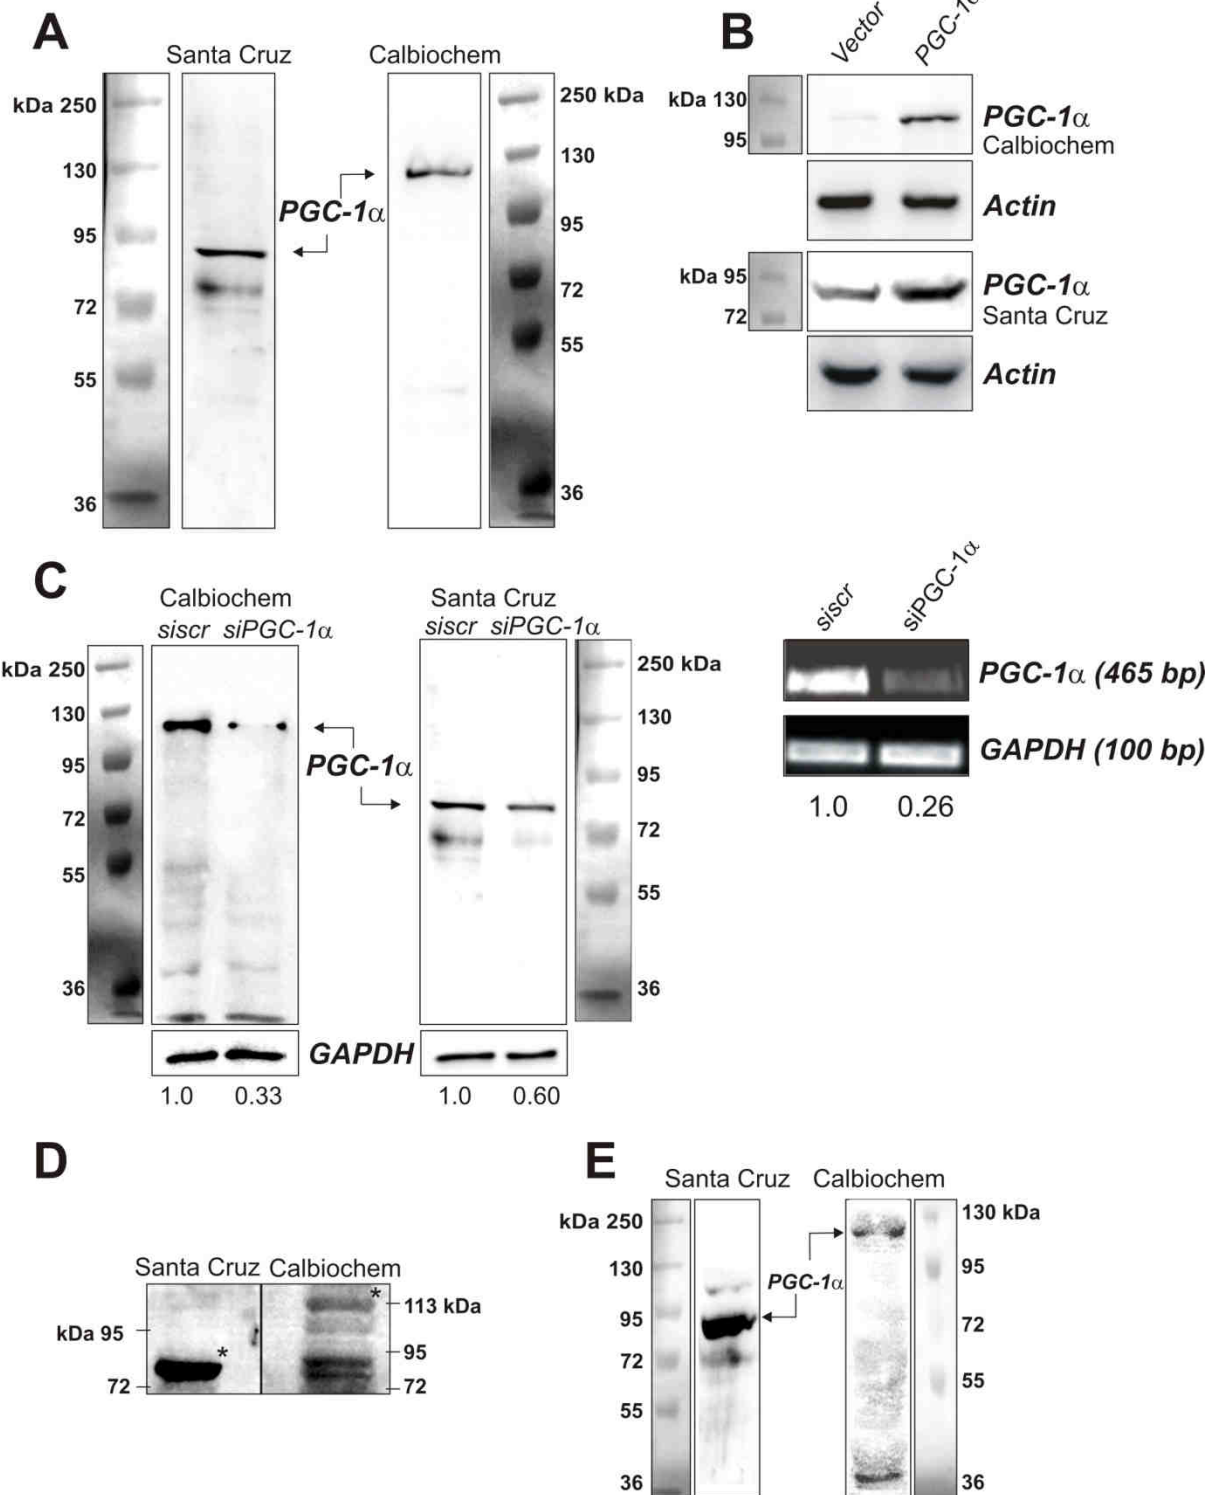

**SUPPLEMENTAL FIGURE 2**

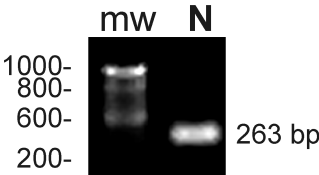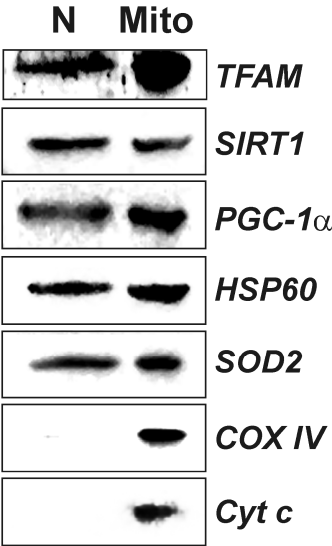

Supplement: supp_M109.070169_jbc.M109.070169-1.pdf [file supp_M109.070169_jbc.M109.070169-1.pdf]
